# Supplementary material for: Tuning plasmonic properties by promoting the inward Hg diffusion via oxygen plasma treatment in gold nanorods coated with a mesoporous silica shell
Source: Royal Society of Chemistry journal article supplement (doi:10.1039/d2an01007k), 2022-01-01

# Figure S1

AuNRs@mSiO<sub>2</sub>

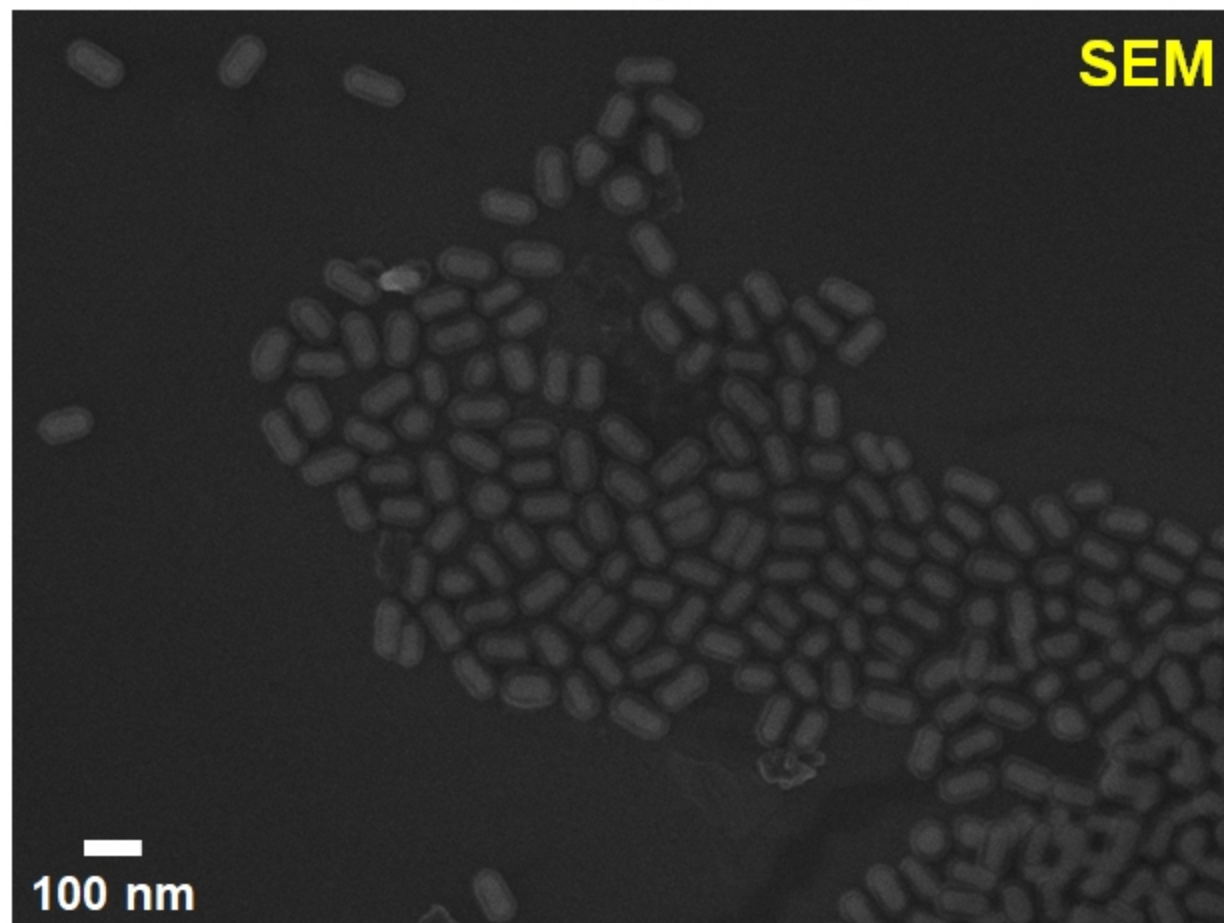

Figure S2

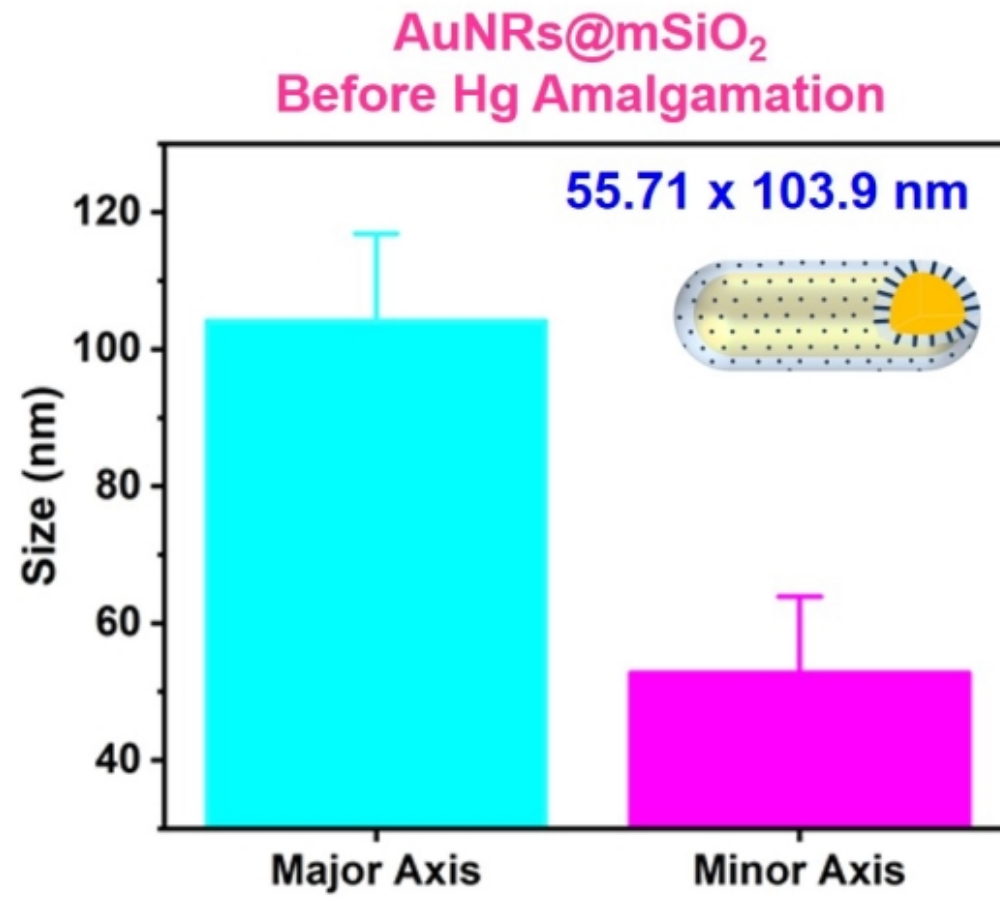

Figure S3

AuNRs@mSiO<sub>2</sub>

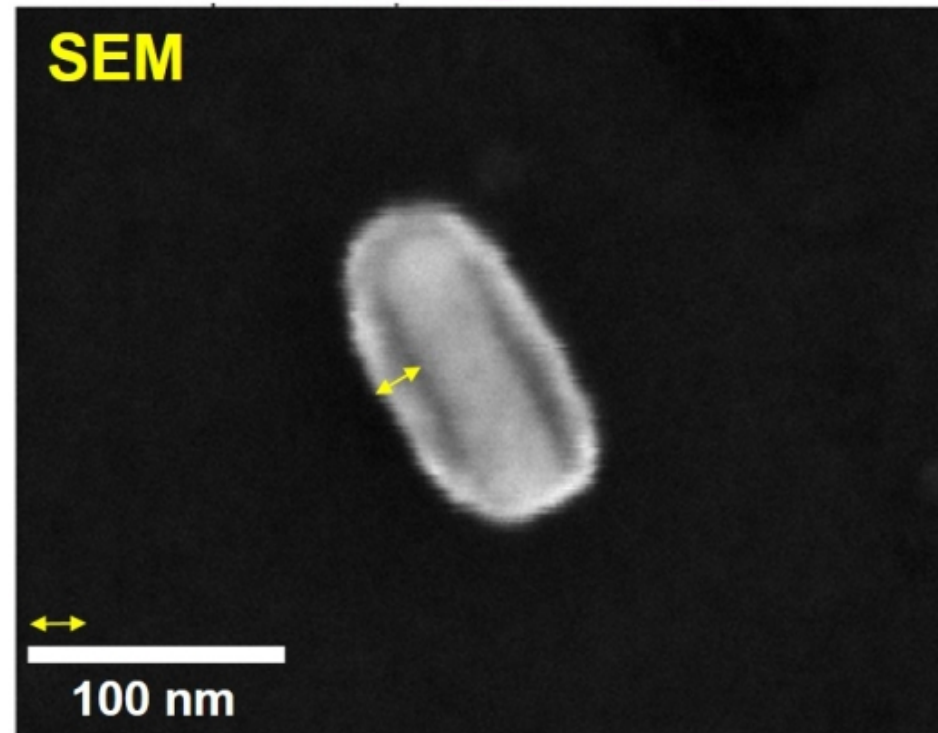

Silica shell thickness: 19 nm

Figure S4

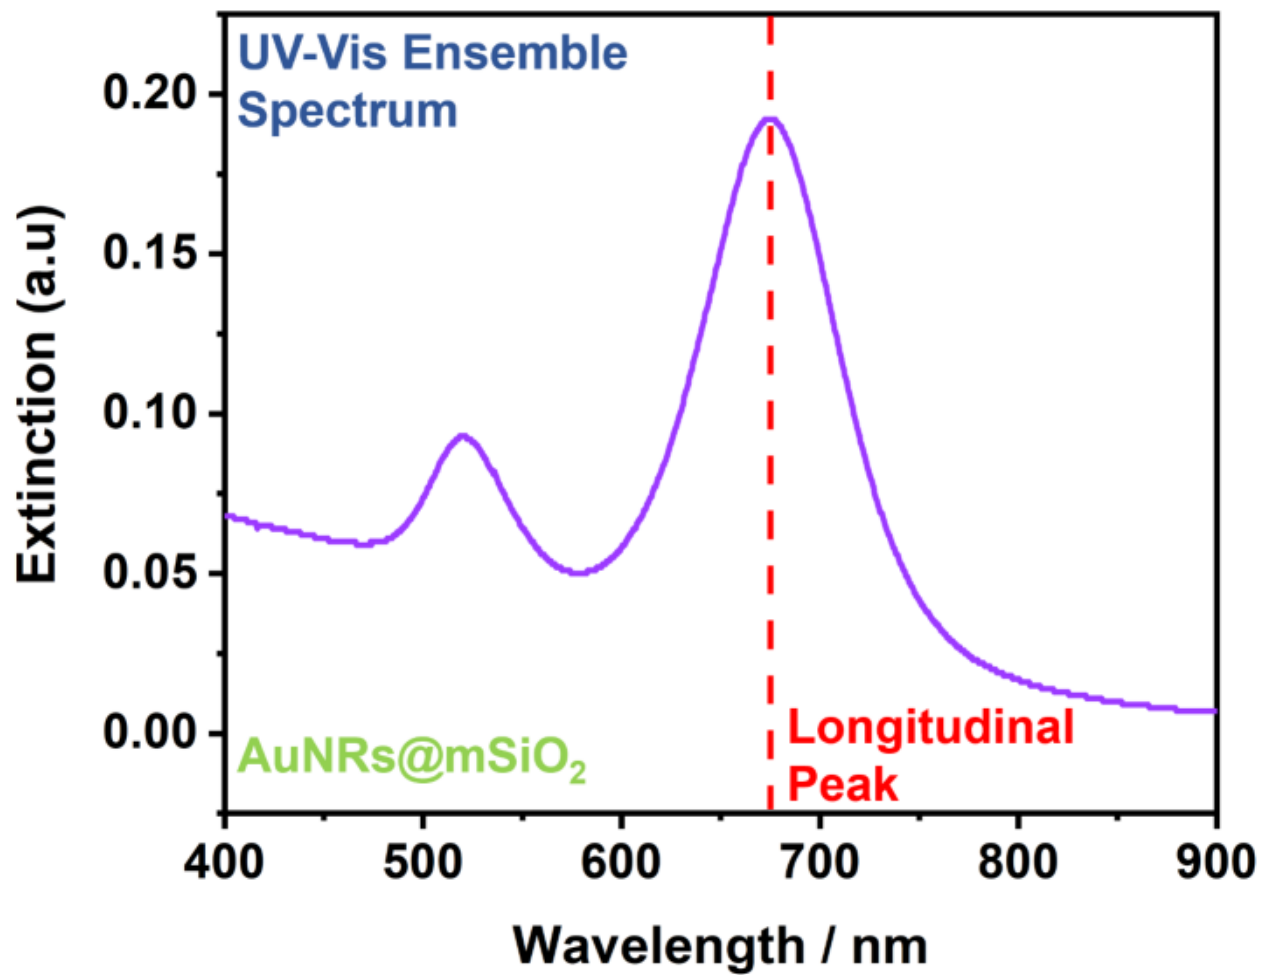

Figure S5

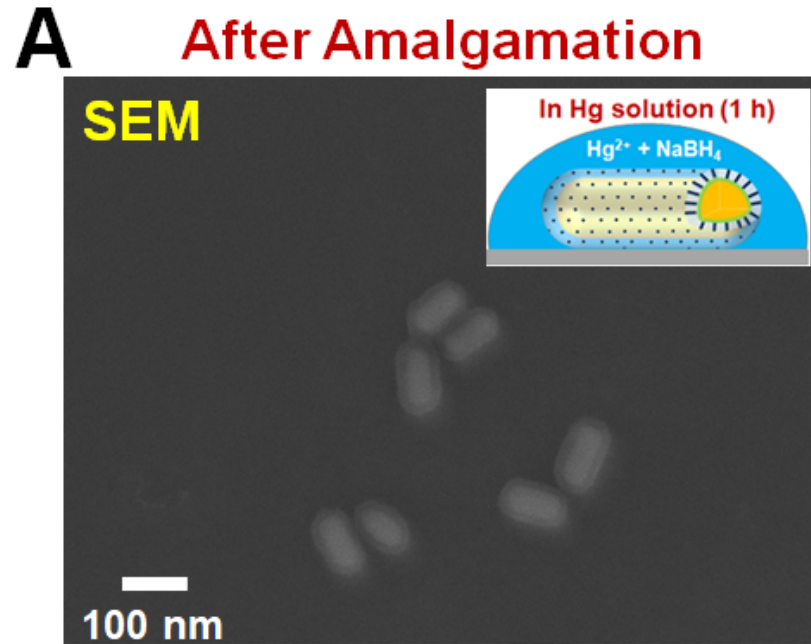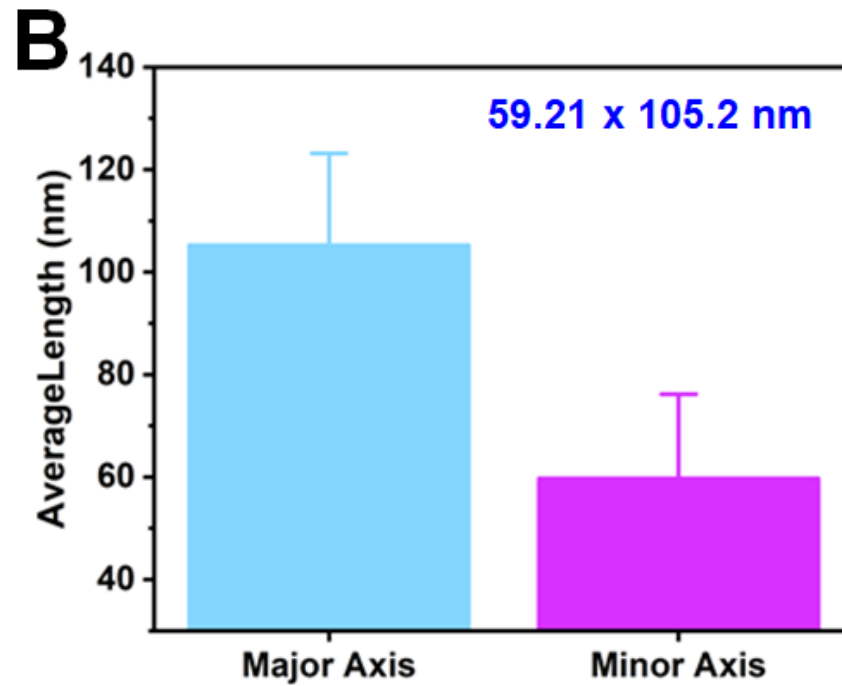

Figure S6

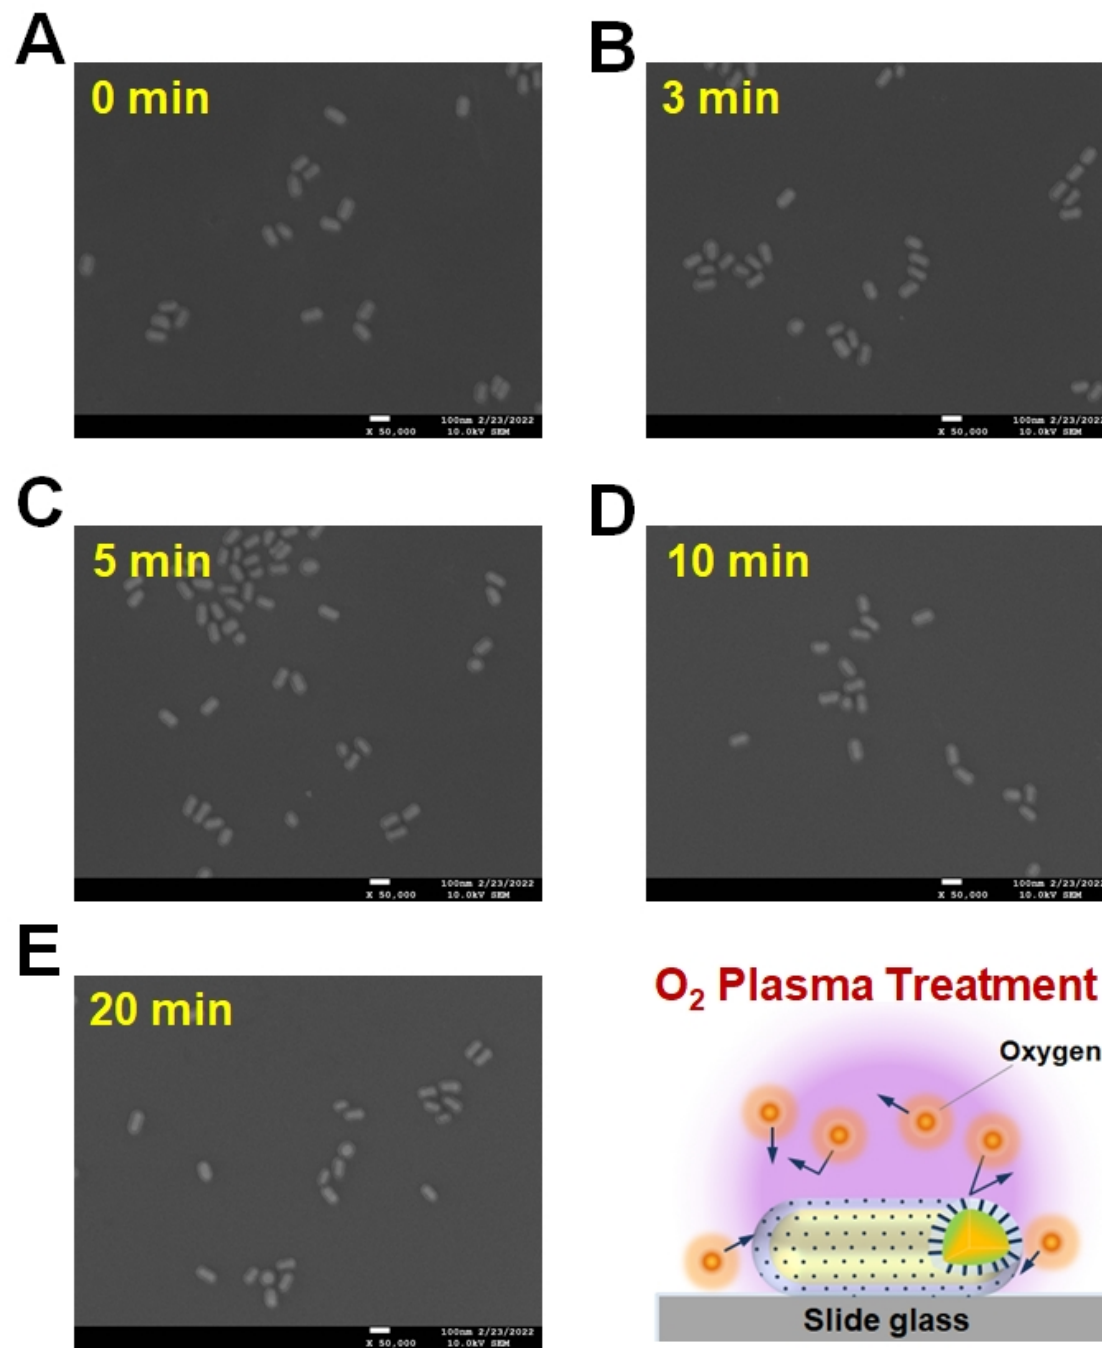

Figure S7

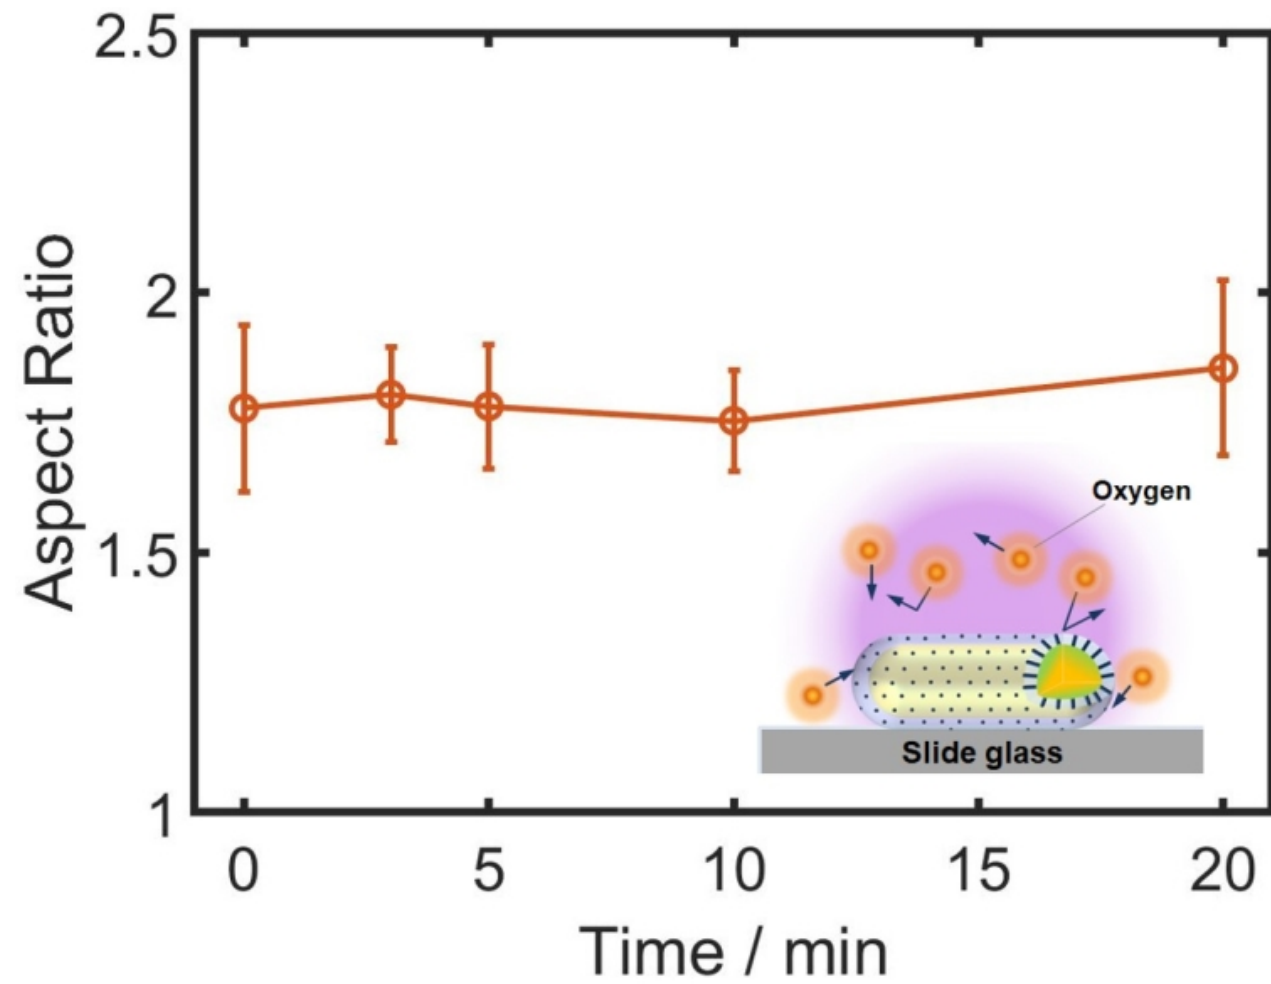

Figure S8

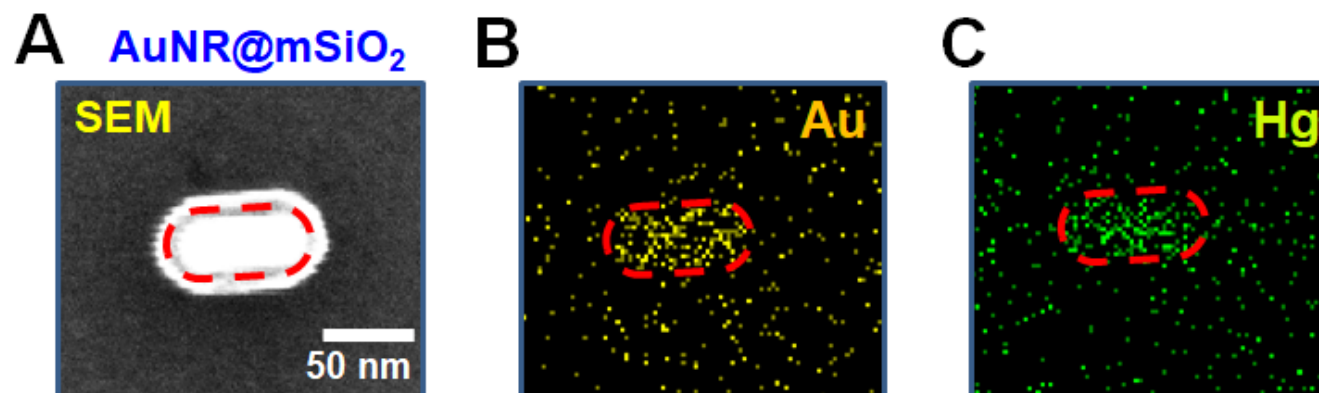

After Hg Amalgamation, O<sub>2</sub> Plasma Treatment : 0 min

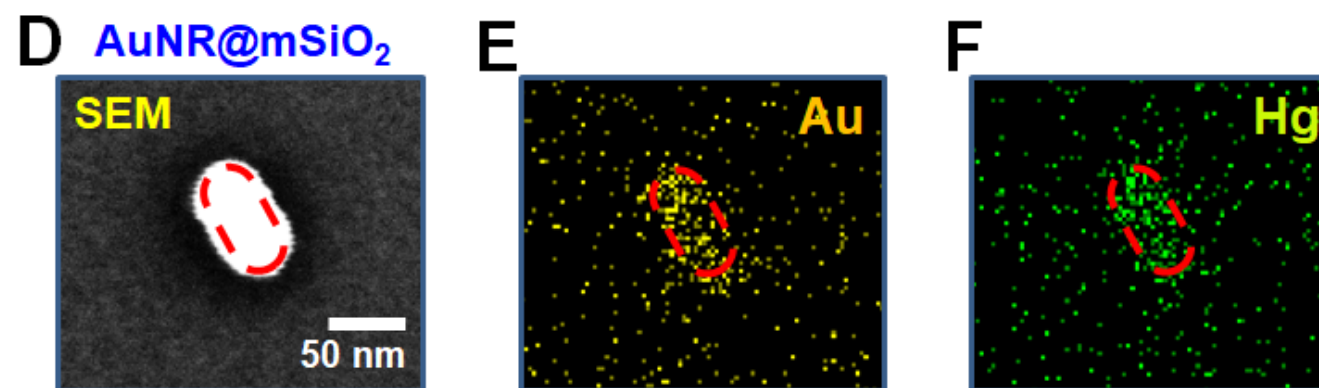

After Hg Amalgamation, O<sub>2</sub> Plasma Treatment : 20 min

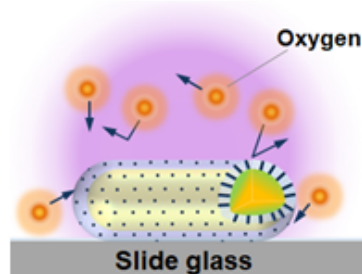



**Figure S9**

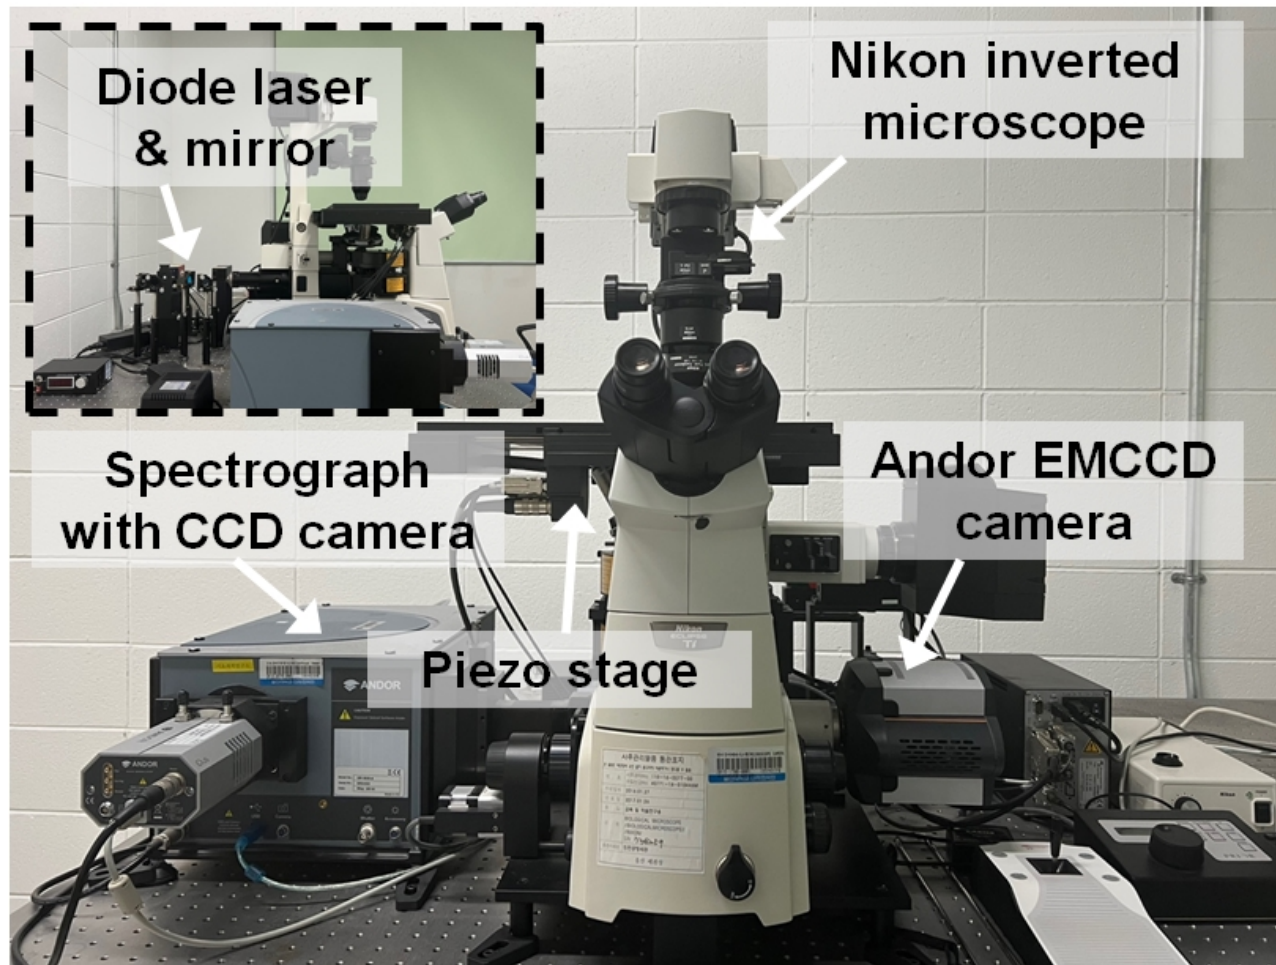

Figure S10

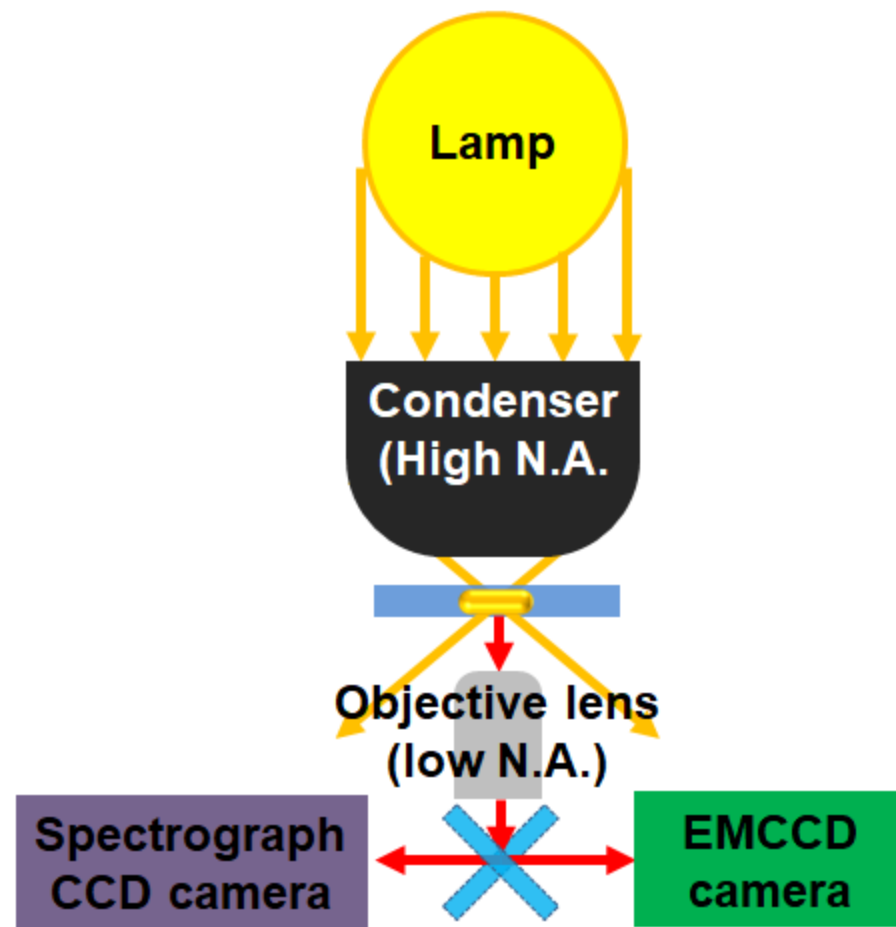

Figure S11

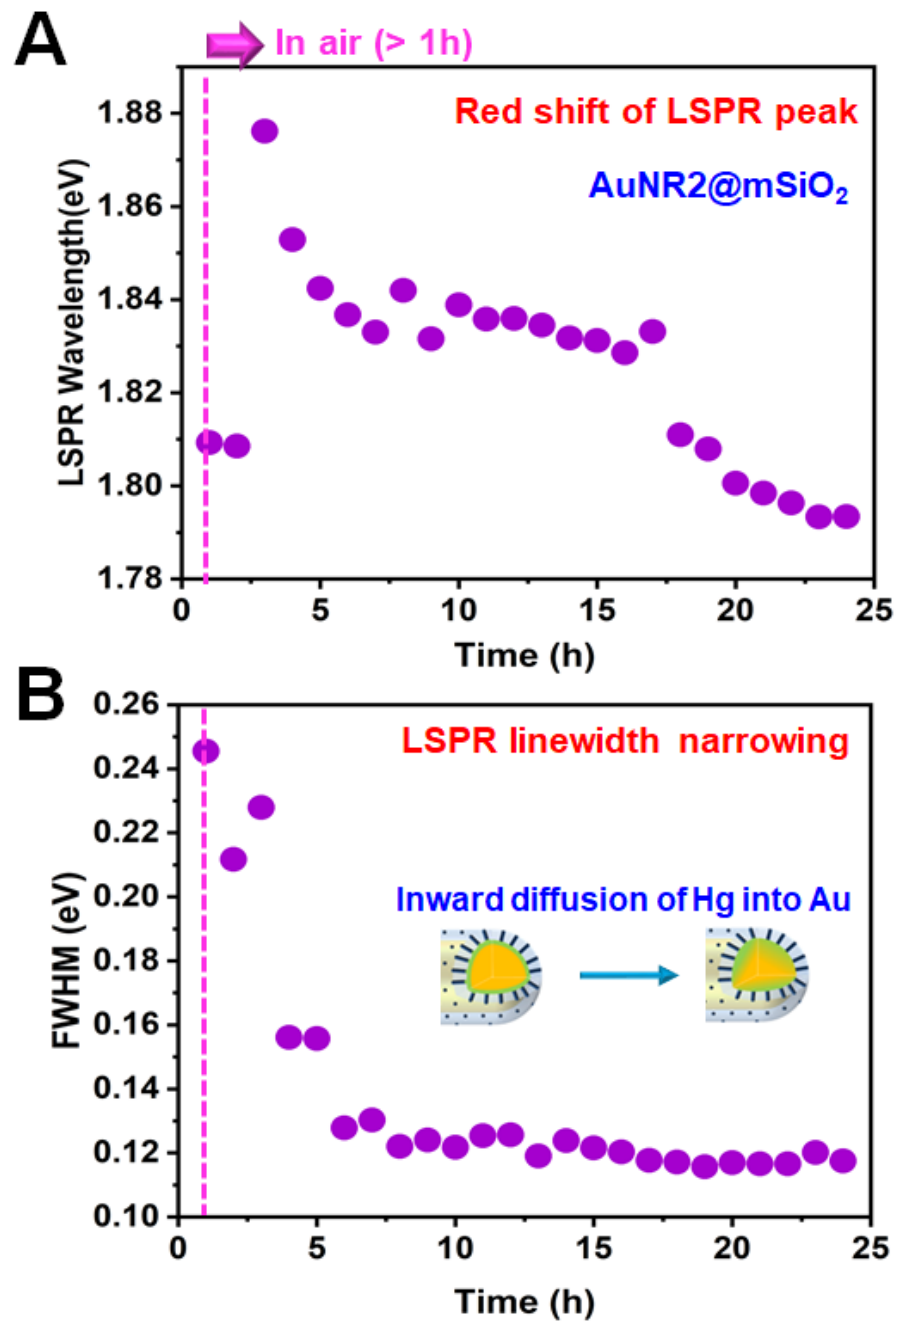

Figure S12

**A** Before O<sub>2</sub> Plasma Treatment

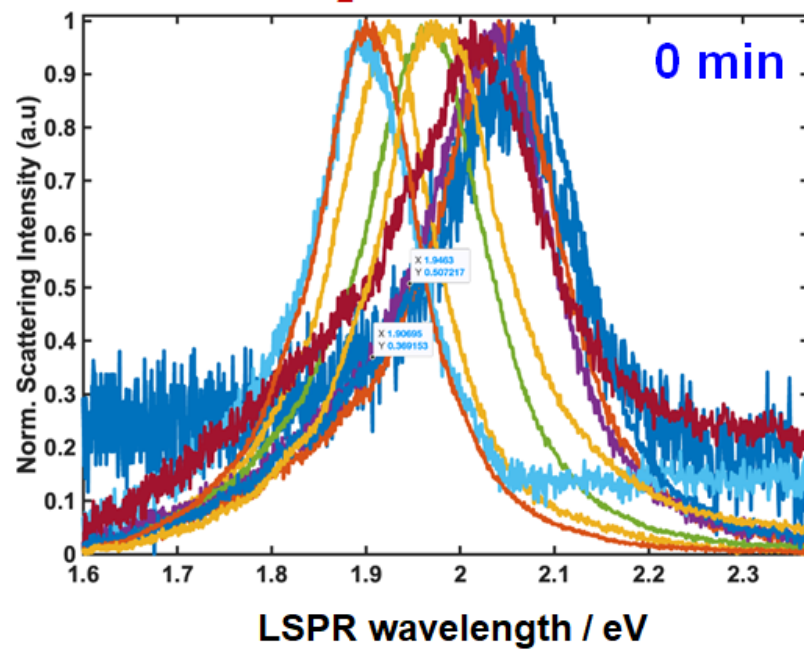

**B** After O<sub>2</sub> Plasma Treatment

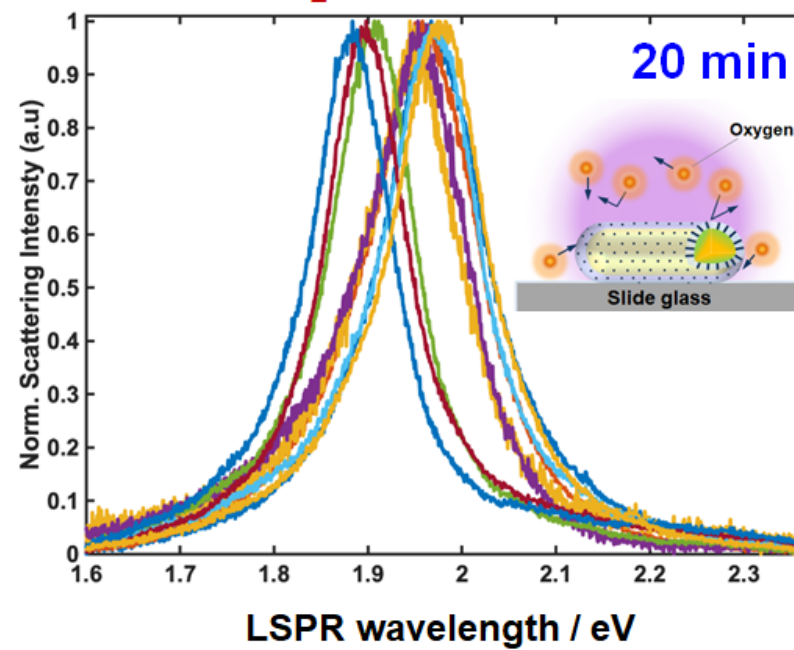

Supplement: d2an01007k2.pdf [file d2an01007k2.pdf]
