# Supplementary material for: Tuning plasmonic properties by promoting the inward Hg diffusion via oxygen plasma treatment in gold nanorods coated with a mesoporous silica shell
Source: Royal Society of Chemistry journal article supplement (doi:10.1039/d2an01007k), 2022-01-01
Supplement: d2an01007k1.pdf [file d2an01007k1.pdf]

## Electronic Supplementary Information

*for*

### **Tuning Plasmonic Properties by Promoting the Inward Hg Diffusion *via* Oxygen Plasma Treatment in Gold Nanorods Coated with Mesoporous Silica Shell**

Yola Yolanda Alizar,<sup>1</sup> Mukunthan Ramasamy,<sup>2</sup> and Ji Won Ha<sup>1,2,\*</sup>

<sup>1</sup>Department of Chemistry, University of Ulsan, 93 Daehak-ro, Nam-gu, Ulsan 44610, South Korea

<sup>2</sup>Energy Harvest-Storage Research Center (EHSRC), University of Ulsan, 93 Daehak-ro, Nam-gu, Ulsan, South Korea

\*To whom correspondence should be addressed.

**J. W. Ha**

Phone: +82-52-712-8012

Fax: +82-52-712-8002

E-mail: [jwha77@ulsan.ac.kr](mailto:jwha77@ulsan.ac.kr)

This document contains experimental methods and supplementary figures (Fig. S1 to S12).

## Experimental Methods

**Materials and Sample Preparation.** Mercury (II) chloride ( $\text{HgCl}_2$ ,  $\geq 99.5\%$ ) and sodium borohydride ( $\text{NaBH}_4$ ,  $\geq 98\%$ ) were purchased from Sigma-Aldrich (St. Louis, MO, USA) and used without further purification. The AuNRs@mSiO<sub>2</sub> used in this study were purchased from Nanopartz (Loveland, CO, USA). To prevent aggregation and maintain the proper concentration of the nanoparticles on the substrate surface, the colloidal solutions of AuNRs@mSiO<sub>2</sub> were diluted to the necessary concentration with 18.2-M $\Omega$  pure distilled water and sonicated for 15 min. The samples were made by spin-casting the diluted AuNRs@mSiO<sub>2</sub> solution onto a precleaned (ultrasonically in ethanol, distilled water, and isopropanol for 15 min, respectively) glass slide and allowed to dry. Afterward, the samples were exposed to Hg amalgamation and oxygen plasma treatment. For single-particle scattering microscopy and spectroscopy studies, a 22  $\times$  22 mm no. 1.5 coverslip (Corning, NY) was placed on the glass slide. To investigate nanoparticles at a single-particle level and minimize the inter-particle LSPR coupling, the concentration of nanoparticles on the slide glass surface was controlled to be 1  $\mu\text{m}^{-2}$  in this study.

**Structural Characterization.** A scanning electron microscope (SEM, JSM-6500F, JEOL, Japan) and a transmission electron microscope (TEM, JEL-2100F, JEOL, Japan) were used to characterize AuNRs@mSiO<sub>2</sub> before and after Hg amalgamation. The length and width of AuNRs@mSiO<sub>2</sub> before and after Hg amalgamation were determined using SEM images, and the structural alterations were investigated. The structural alterations on amalgamated single AuNRs@mSiO<sub>2</sub> were then examined in relation to varied oxygen plasma exposure times.

Furthermore, using SEM and an energy dispersive X-ray spectrometer (EDX), elemental mapping pictures of amalgamated AuNRs@mSiO<sub>2</sub> were obtained.

**Oxygen Plasma Treatment.** A plasma cleaner (PDC-32G-2, Harrick Plasma, USA) was used to execute the oxygen plasma treatment. All oxygen plasma treatments were conducted with a maximum RF power of 18W at various plasma treatment times of 0, 3, 5, 10, 15, and 20 min.

**Scattering-based DF Microscopy.** An inverted Nikon microscope (Nikon Eclipse Ti-2) was used to perform DF microscopy imaging. In DF mode, the microscope used a Nikon Plan Fluor 100 × 0.5-1.3 oil iris objective (NA = 0.7–1.4). An inverted Nikon DF condenser (NA = 0.7–1.4). An Andor iXon EMCCD camera (iXon Ultra 897) was used to capture detailed DF scattering images of desired nanoparticles. The collected images were analyzed using ImageJ and Matlab.

**Single-Particle Scattering Spectroscopy.** DF scattering spectra of single AuNRs@mSiO<sub>2</sub> and Hg amalgamated AuNRs@mSiO<sub>2</sub> were acquired with an Andor spectrophotometer (SHAMROCK 303i, SR-303I-A) connected with an Andor CCD camera (Newton DU920P-OE). The single-particle scattering spectrum was acquired by shifting the scanning stage to the appropriate sample location, allowing the objective to gather only the scattered light from the selected nanoparticle. The scattered light from a single nanoparticle was directed to a spectrophotometer, where it was dispersed by a grating (300 l/mm) and detected by a Newton CCD camera (center wavelength of 700 nm). The background was measured in a particle-free environment. Data analysis was performed using custom-made Matlab scripts.

## Additional Discussion

**The Au and Hg Interaction Mechanism.** Due to the strong affinity between Au and Hg, the liquid Hg formed in the solution chemisorbed on the Au surface initially and then forms a surface metallic layer of Hg. The presence of the Hg surface layer facilitates the alloy structure formation of Au-Hg as in the following equation.<sup>1</sup>

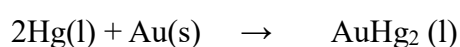

Due to the low Hg cohesive energy (0.67 eV/atom) compared to Au (3.81 eV/atom), the Au–Hg alloy formation is facilitated by dissolution and diffusion of Au atom into Au/Hg interface or Hg layer up to a certain degree. This is observed in changes of LSPR peak energy and linewidth as discussed in this work.

## References

- 1) M. Rex, F. E. Hernandez and A. D. Campiglia, *Anal. Chem.*, 2006, **78**, 445-451.

## Supplementary Figures

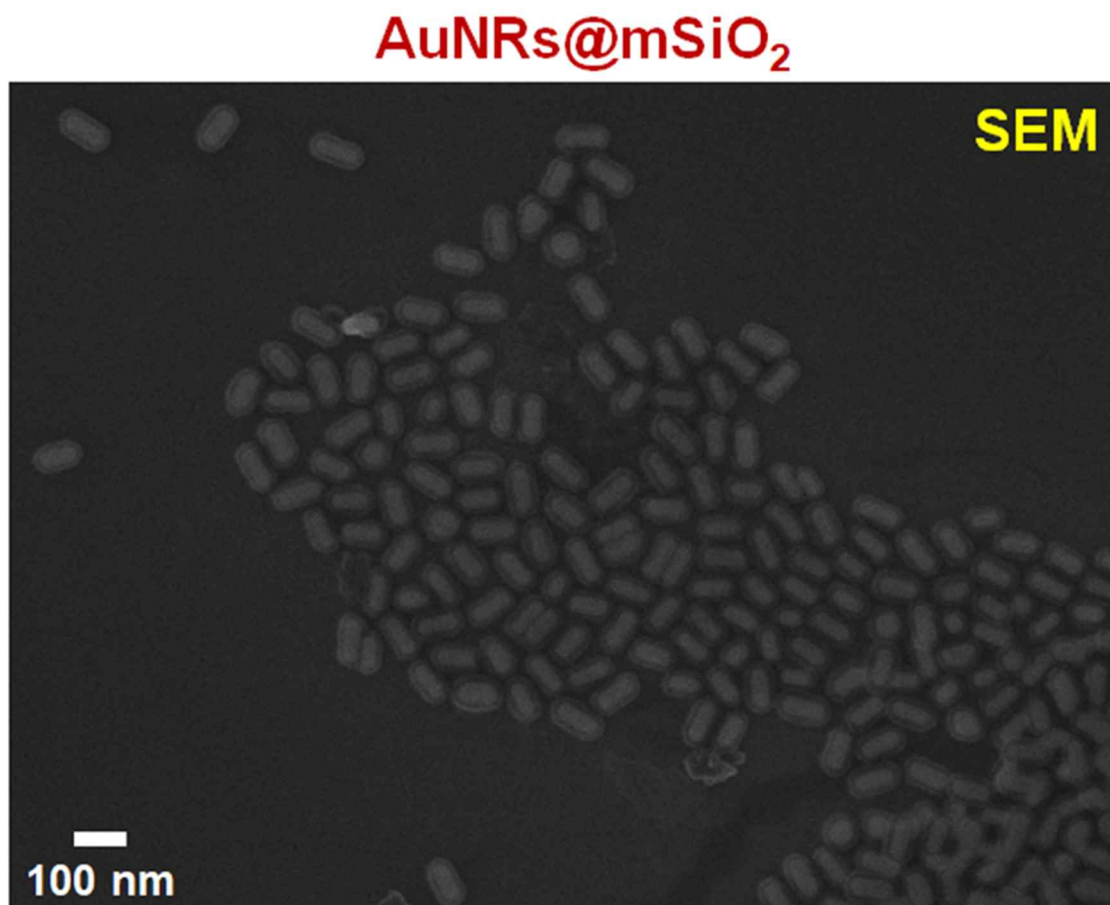

**Fig. S1** SEM image of AuNRs@mSiO<sub>2</sub> (before the Hg amalgamation).

**AuNRs@mSiO<sub>2</sub>  
Before Hg Amalgamation**

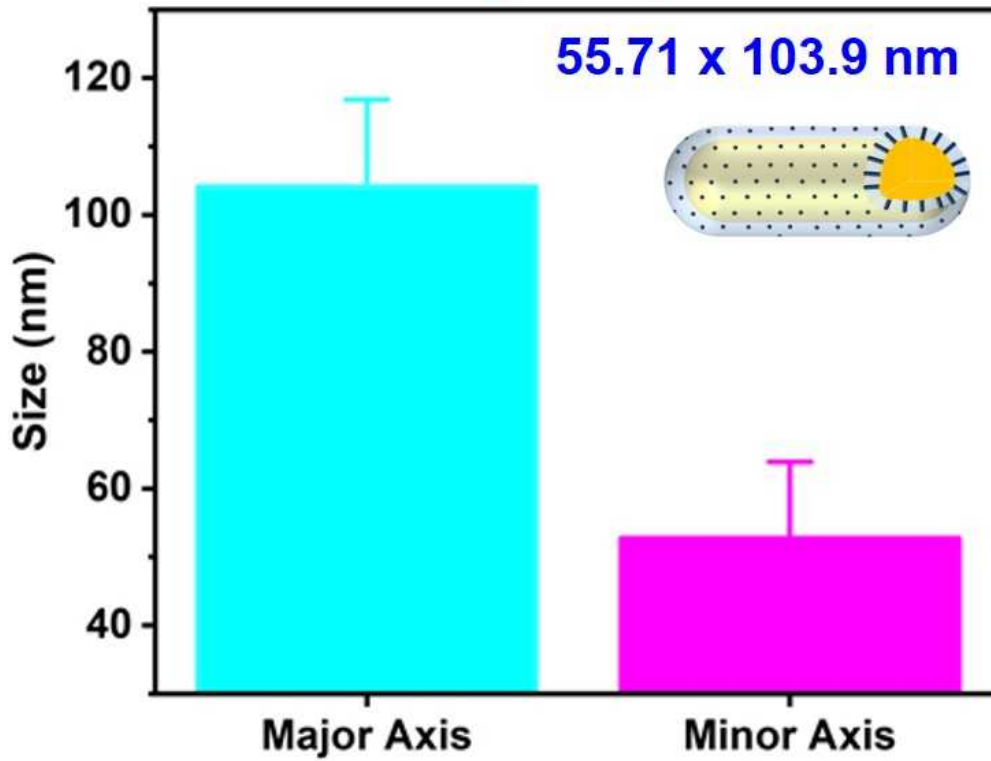

**Fig. S2** Bar graph to show average size of major axis (length) and minor axis (diameter) of AuNRs@mSiO<sub>2</sub> after amalgamation in Hg solution for 1 h.

AuNRs@mSiO<sub>2</sub>

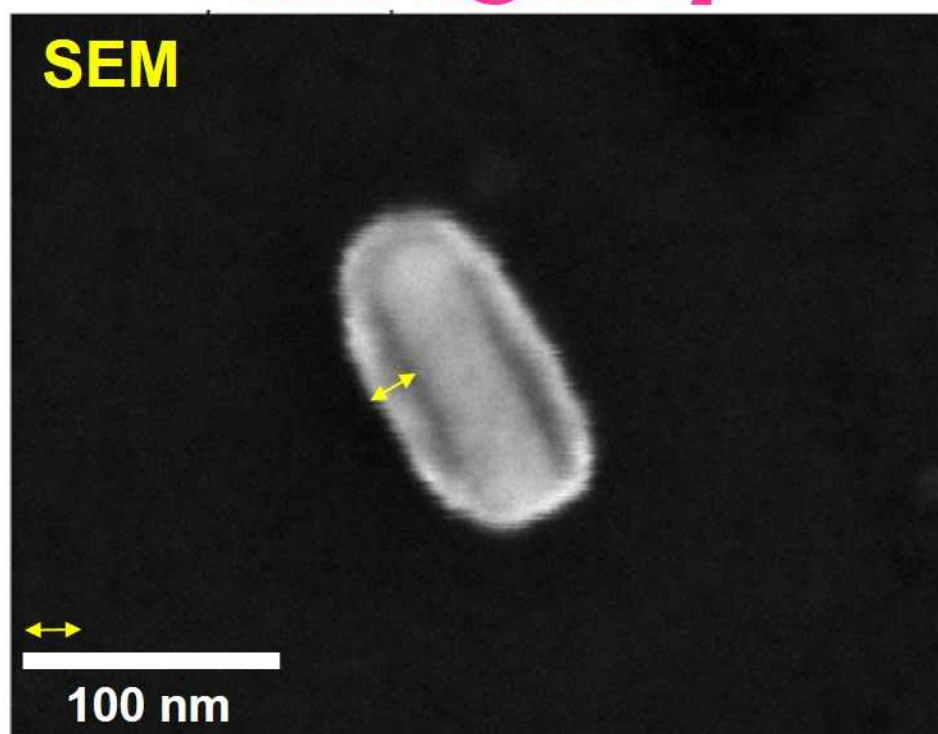

Silica shell thickness: 19 nm

**Fig. S3** SEM image to show the silica shell thickness of AuNR@mSiO<sub>2</sub>. A thickness was determined to be about 19 nm.

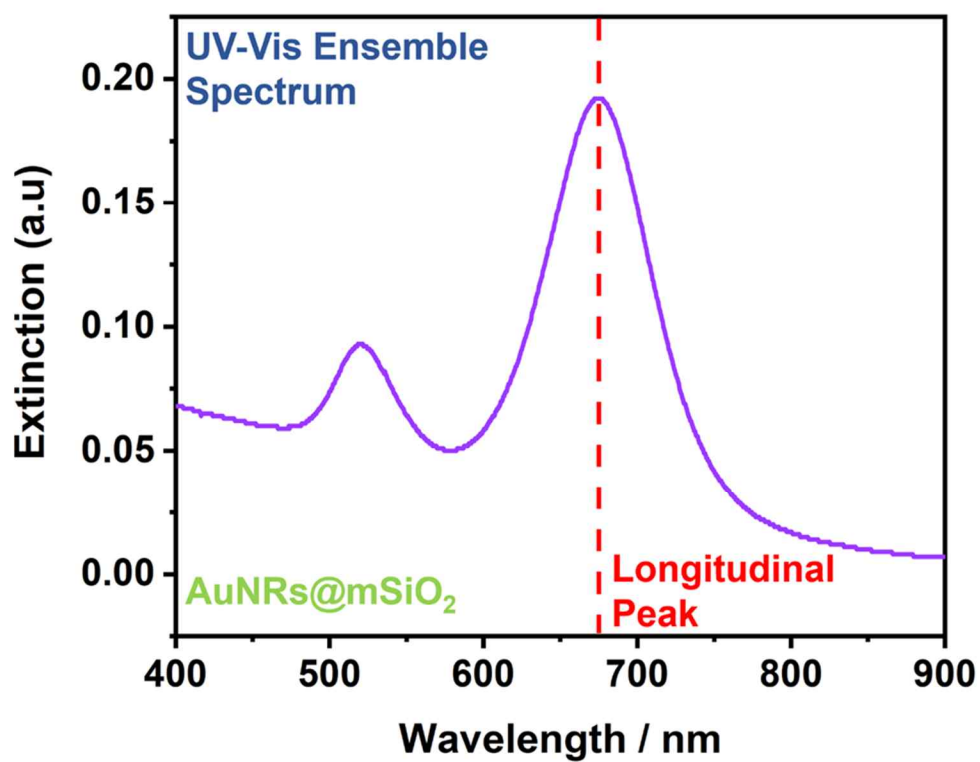

**Fig. S4** UV-Vis extinction spectra of AuNRs@mSiO<sub>2</sub> dispersed in water, showing two distinctive transverse and longitudinal LSPR peaks.



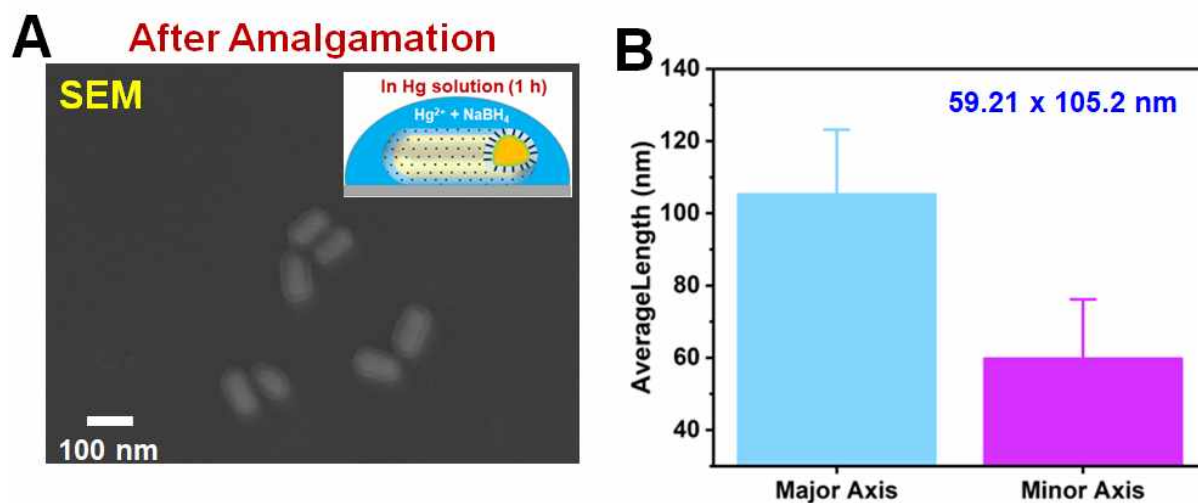

**Fig. S5 (A)** SEM image of AuNRs@mSiO<sub>2</sub> after amalgamation in Hg solution for 1 h. **(B)** Bar graph to show the average size of major (length) axis and minor axis (diameter) of AuNRs@mSiO<sub>2</sub> after Hg amalgamation.

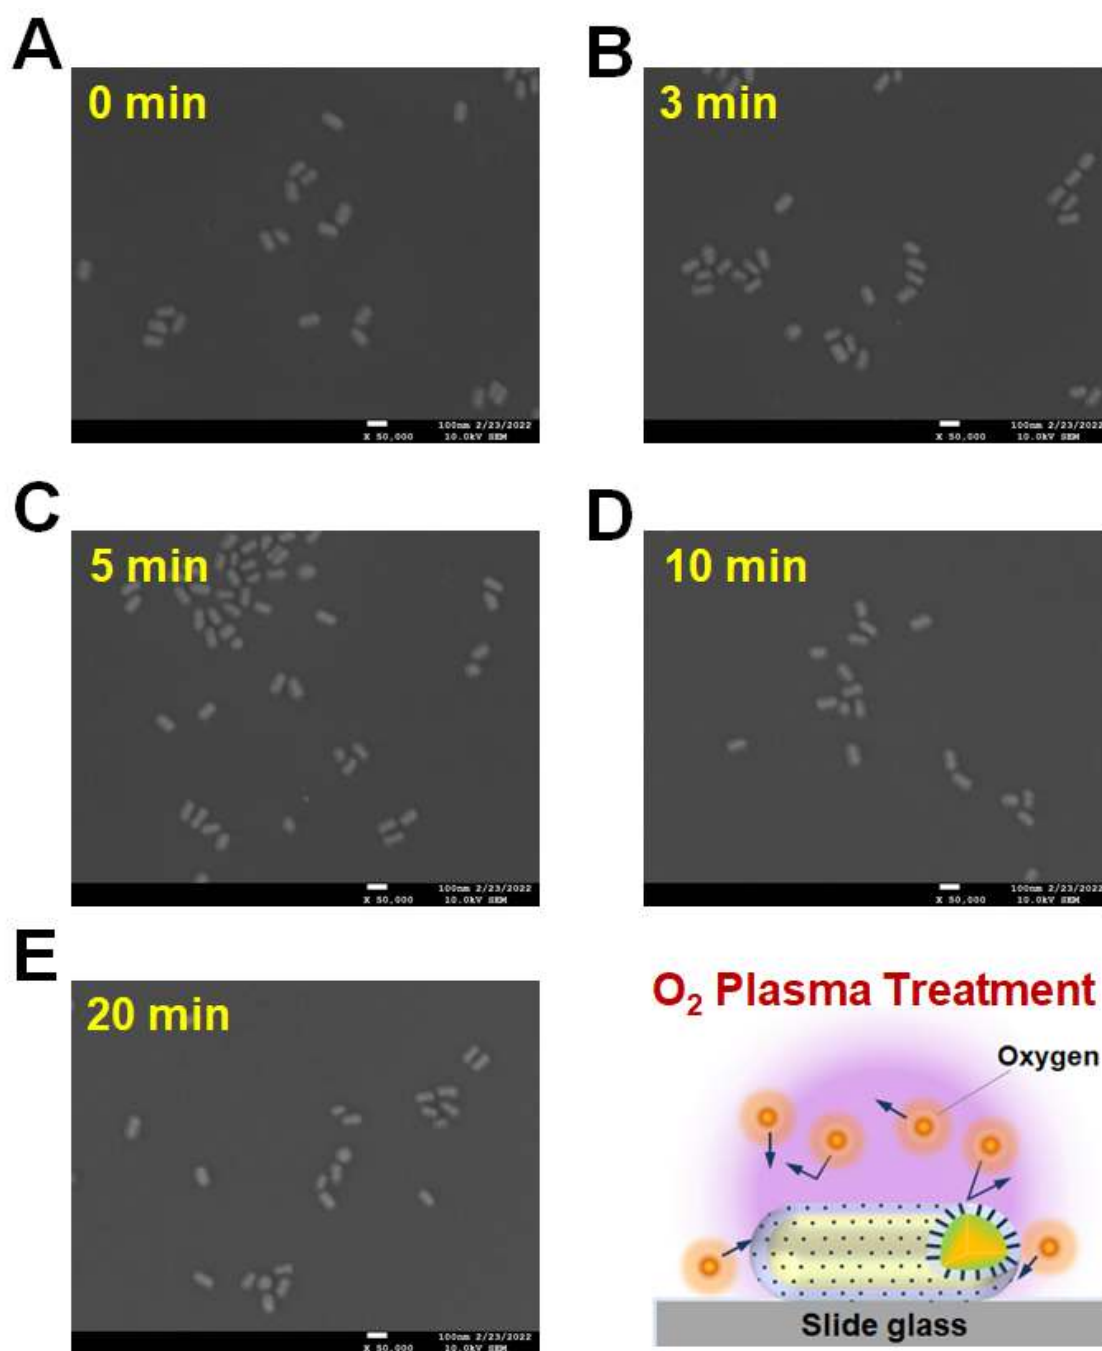

**Fig. S6** SEM images showing Hg amalgamated AuNRs@mSiO<sub>2</sub> at different oxygen plasma treatment times of (A) 0, (B) 3, (C) 5, (D) 10, and (E) 20 min, respectively.

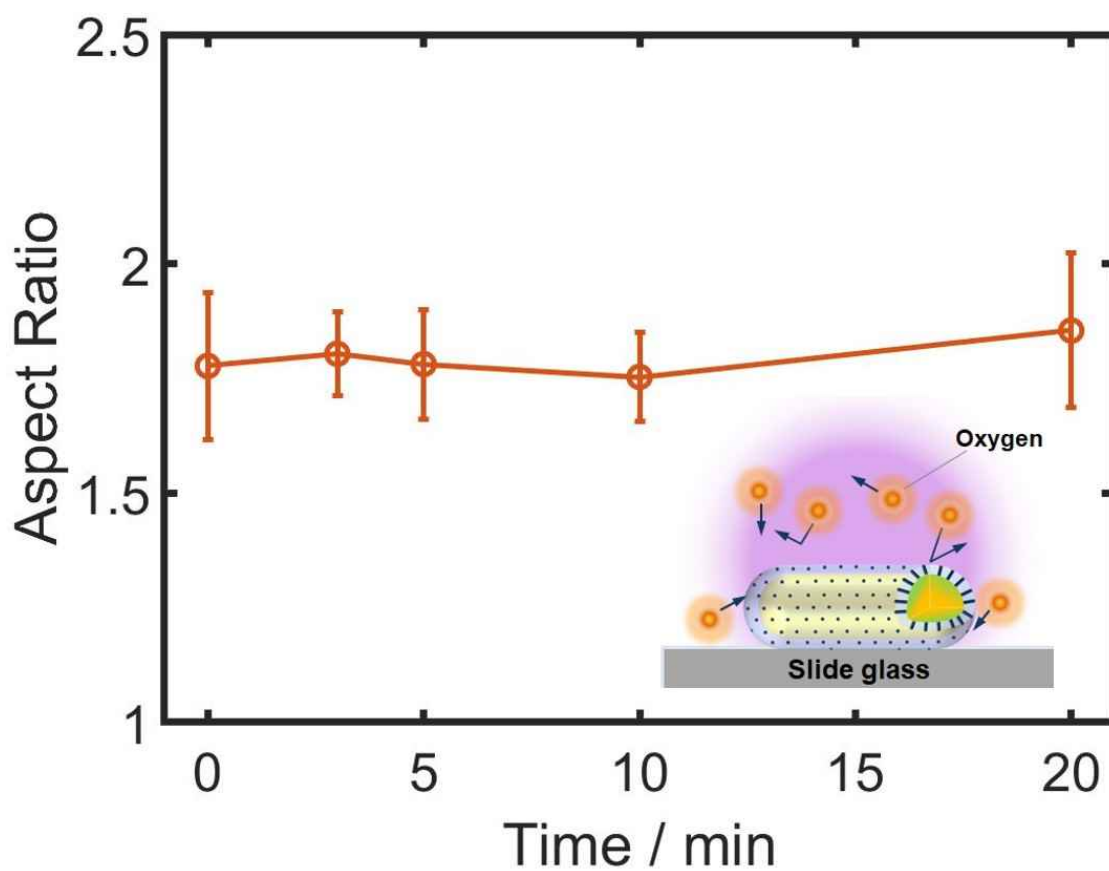

**Fig. S7** A graph to show the change in average AR of amalgamated AuNRs@mSiO<sub>2</sub> at different oxygen plasma treatment times of 1, 3, 5, 10, and 20 min.

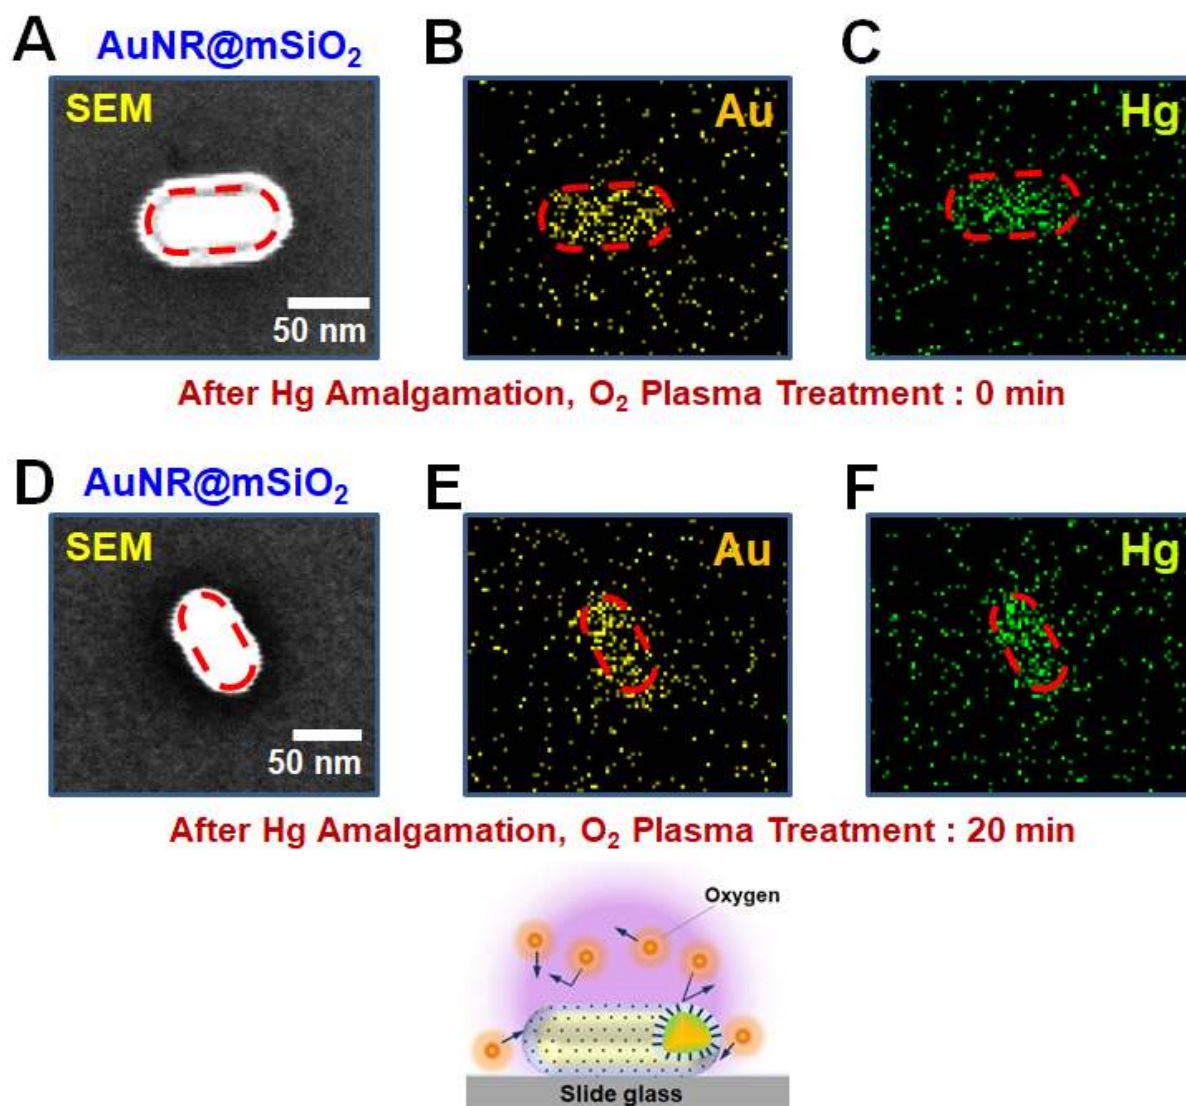

**Fig. S8** SEM with EDX elemental mapping analysis of amalgamated AuNRs@mSiO<sub>2</sub> before and after oxygen plasma treatment. (A–C) Enlarged SEM image and corresponding elemental mapping images of (B) Au and (C) Hg in single amalgamated AuNR@mSiO<sub>2</sub> before plasma treatment (0 min). (D–F) Enlarged SEM image and corresponding elemental mapping image of (E) Au and (F) Hg single amalgamated AuNR@mSiO<sub>2</sub> after 20 min of oxygen plasma treatment.

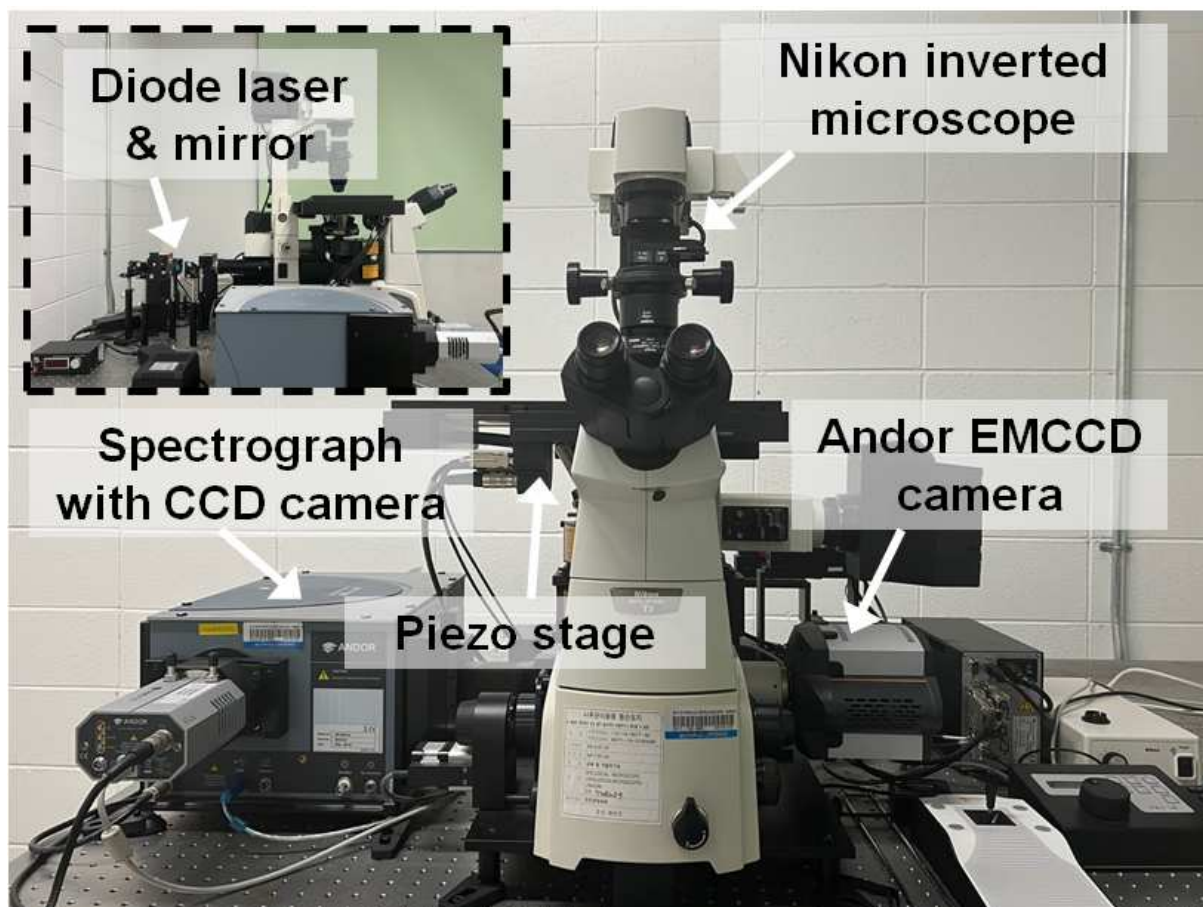

**Fig. S9** A photograph showing the experimental setup for single-particle DF microscopy and spectroscopy

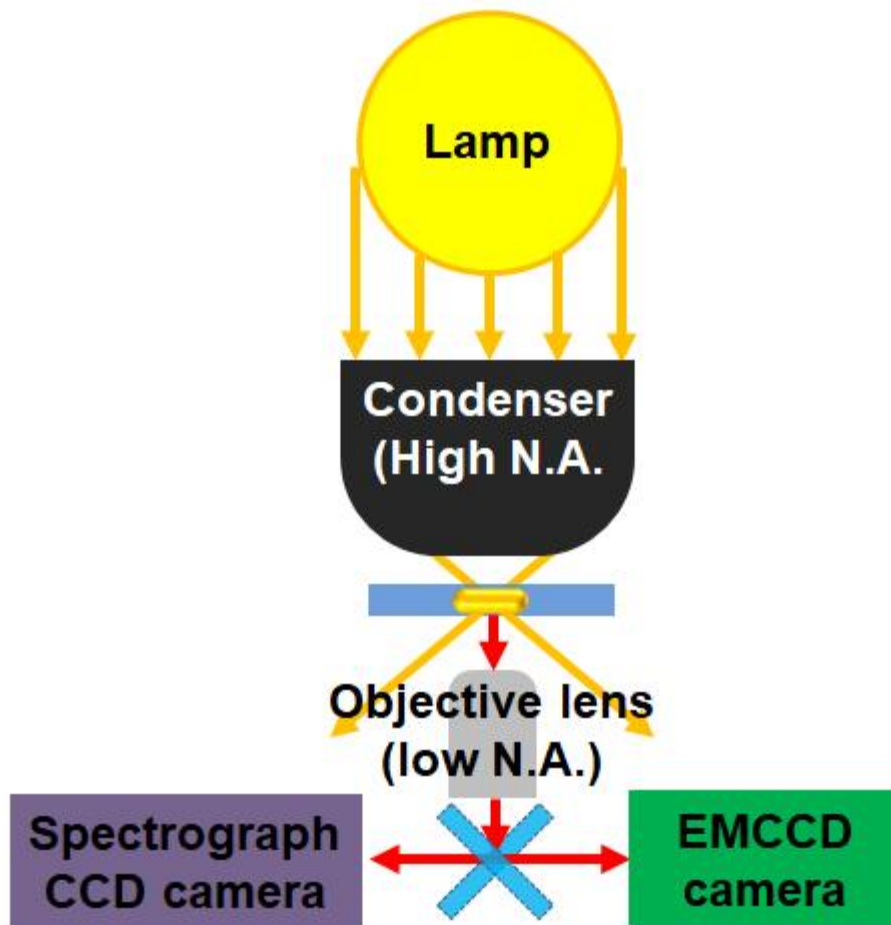

**Fig. S10** Schematic to show a working principle of DF microscopy and spectroscopy

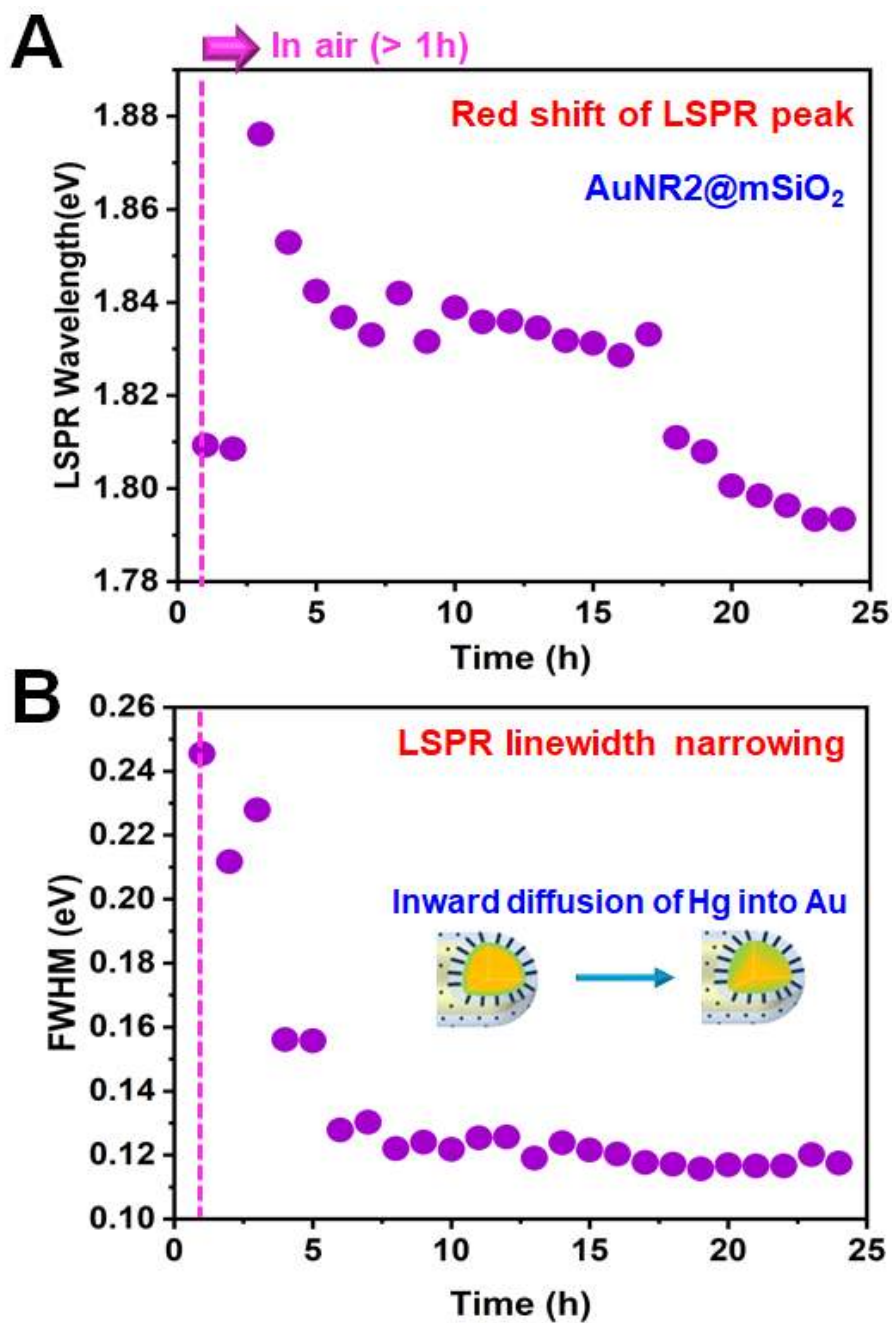

**Fig. S11 (A)** Time-dependent change of the LSPR peak of AuNR2@mSiO<sub>2</sub> (in Fig. 4A) taken out from Hg solution (after 1 h) and exposed to air as a function of time. **(B)** Change in the corresponding FWHM of AuNR2@mSiO<sub>2</sub> as a function of time. Scattering spectrum was obtained at intervals of 1 h.

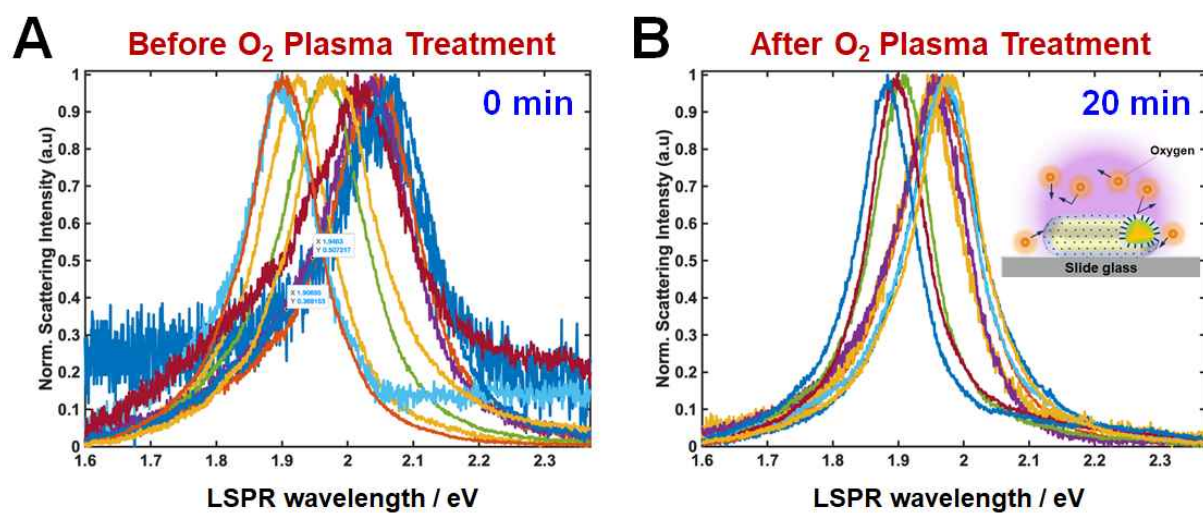

**Fig. S12** Single-particle scattering spectra of amalgamated AuNRs@mSO<sub>2</sub> (**A**) before oxygen plasma treatment and (**B**) after oxygen plasma treatment for 20 min.
